# Supplementary material for: Translocation of intracellular CD24 constitutes a triggering event for drug resistance in breast cancer
Source: PubMed Central journal article supplement (PMC8382710; doi:10.1038/s41598-021-96449-7), 2021-08-23
Supplement: 41598_2021_96449_MOESM1_ESM.pdf [file 41598_2021_96449_MOESM1_ESM.pdf]

## Supplementary figure 1

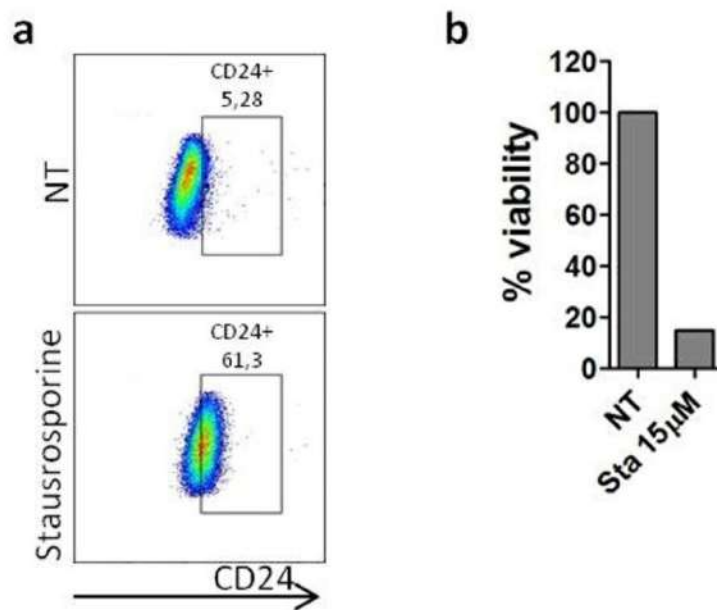

### Supplementary figure 1 - Staurosporine induces CD24 translocation in MDA-MB-231 cells.

**(a)** Flow cytometry analysis of CD24 cell localization after staurosporine treatment. MDA-MB-231 cells were treated with staurosporine (15µM) for 4h. Then, an extracellular staining was performed using anti-CD24/FITC. Pseudocolor plots are representative of triplicates.

**(b)** MDA-MB-231 cells were treated with staurosporine (15µM) for 24h and cell viability was measured by MTT assay. Data represents means of triplicates.

**Supplementary figure 2**

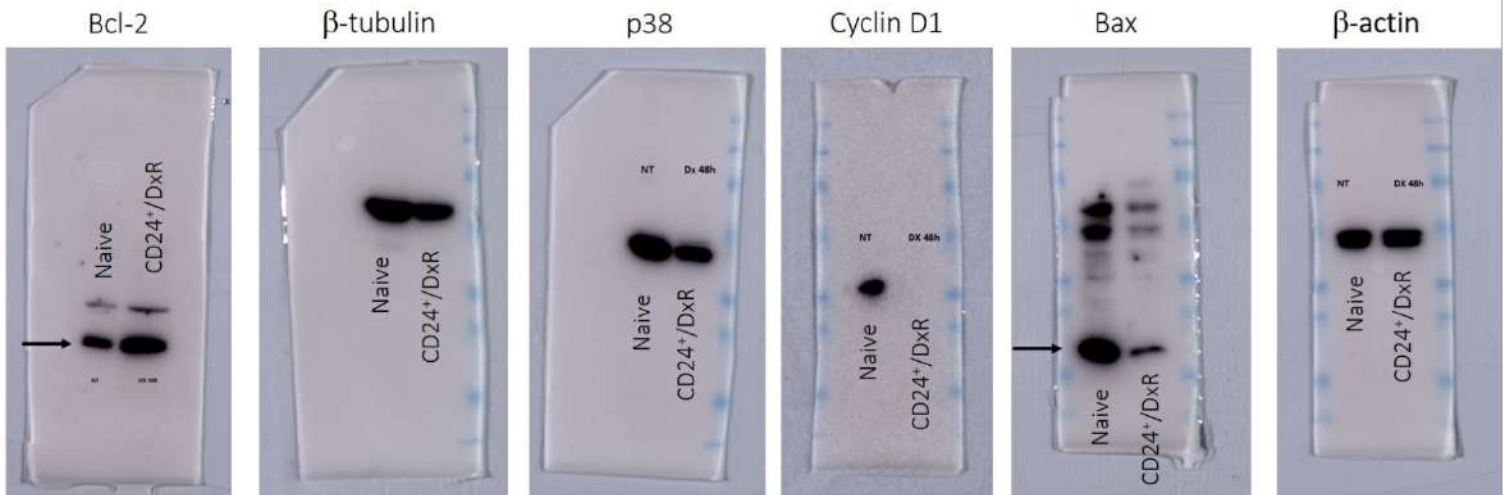

Supplementary figure 2 – Full length blots corresponding to the figure 3c of the manuscript.

### Supplementary figure 3

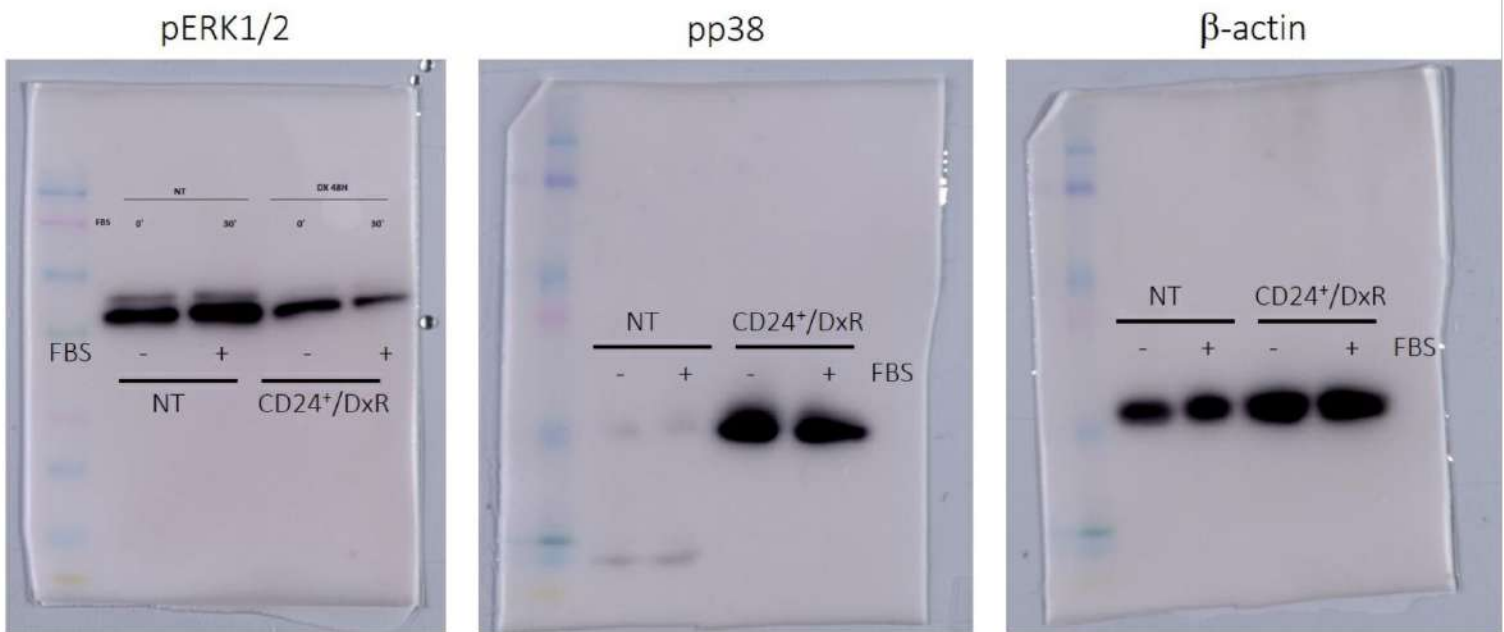

Supplementary figure 3 – Full length blots corresponding to the figure 3d of the manuscript.

Supplementary figure 4

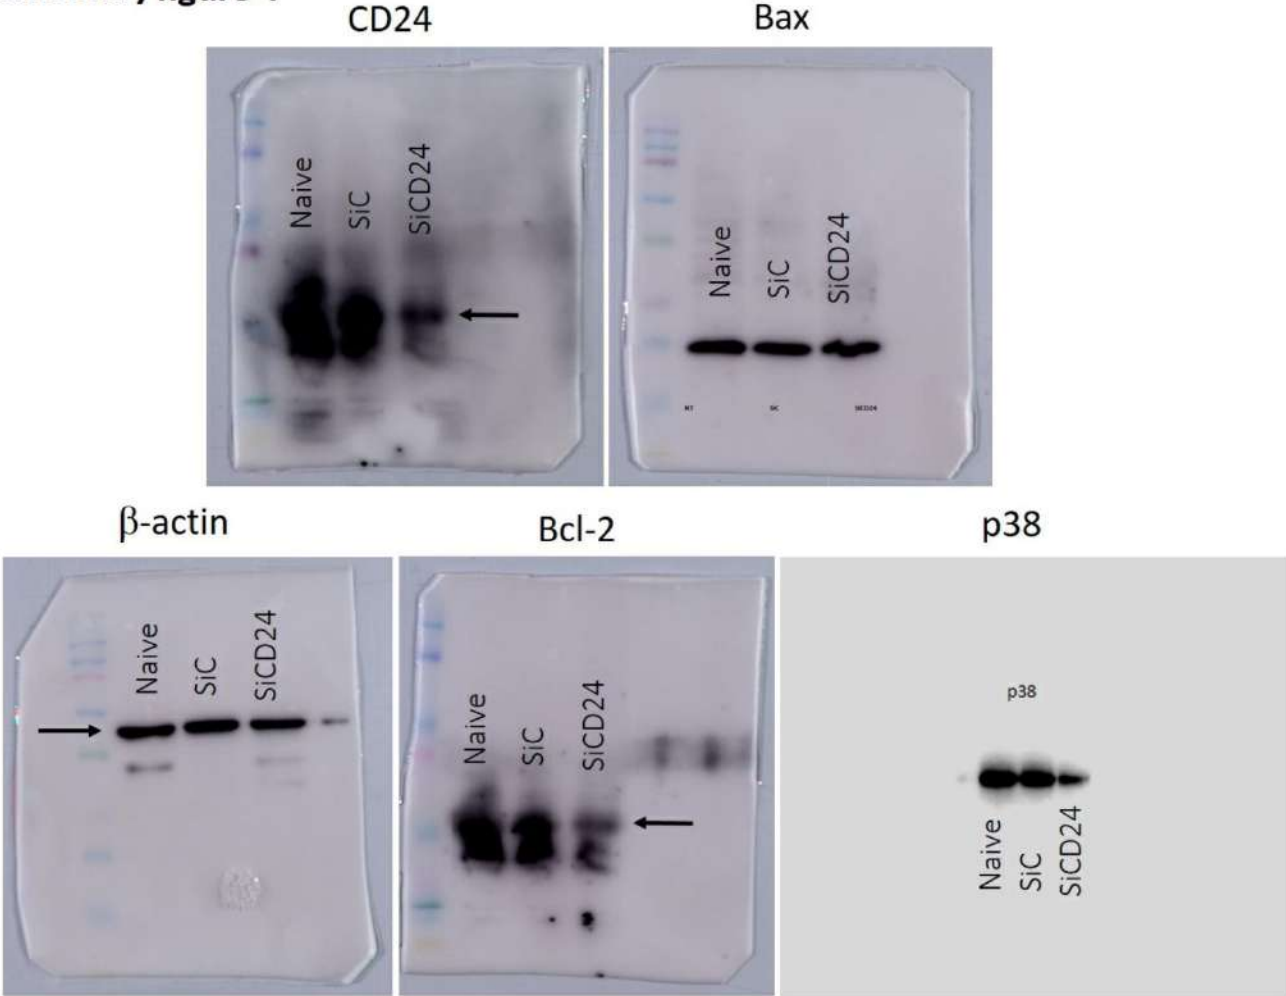

Supplementary figure 4 – Full length blots corresponding to the figure 3e of the manuscript.

**Supplementary figure 4.2 (variable exposure)**

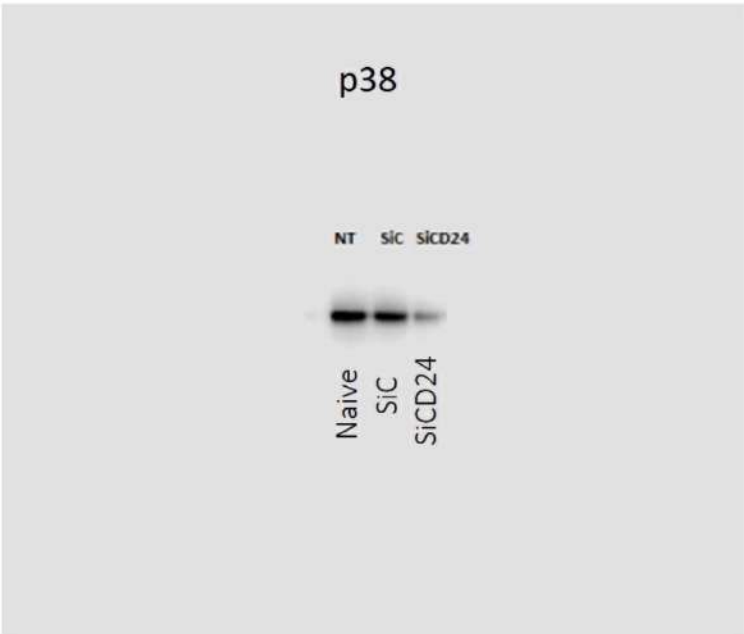

Supplementary figure 4.2 – Full length blots corresponding to the figure 3e of the manuscript.

**Supplementary figure 5**

Cyclin D1

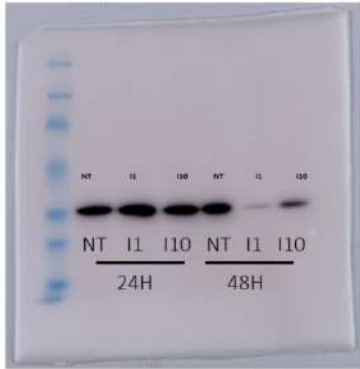

Bcl-2

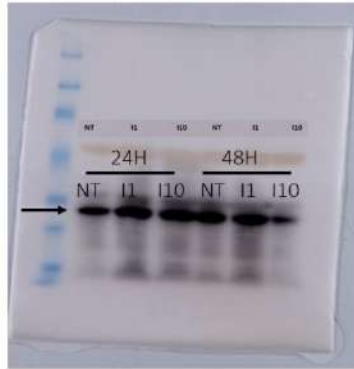

$\beta$ -tubulin

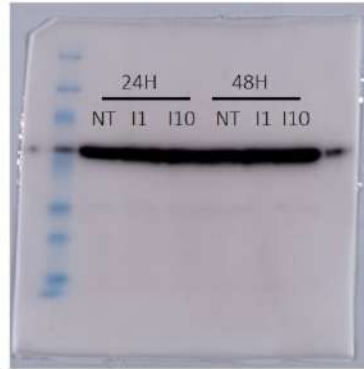

Bax

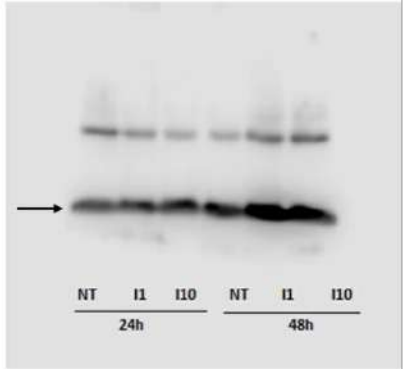

Supplementary figure 5 – Full length blots corresponding to the figure 3j of the manuscript.

**Supplementary figure 6**

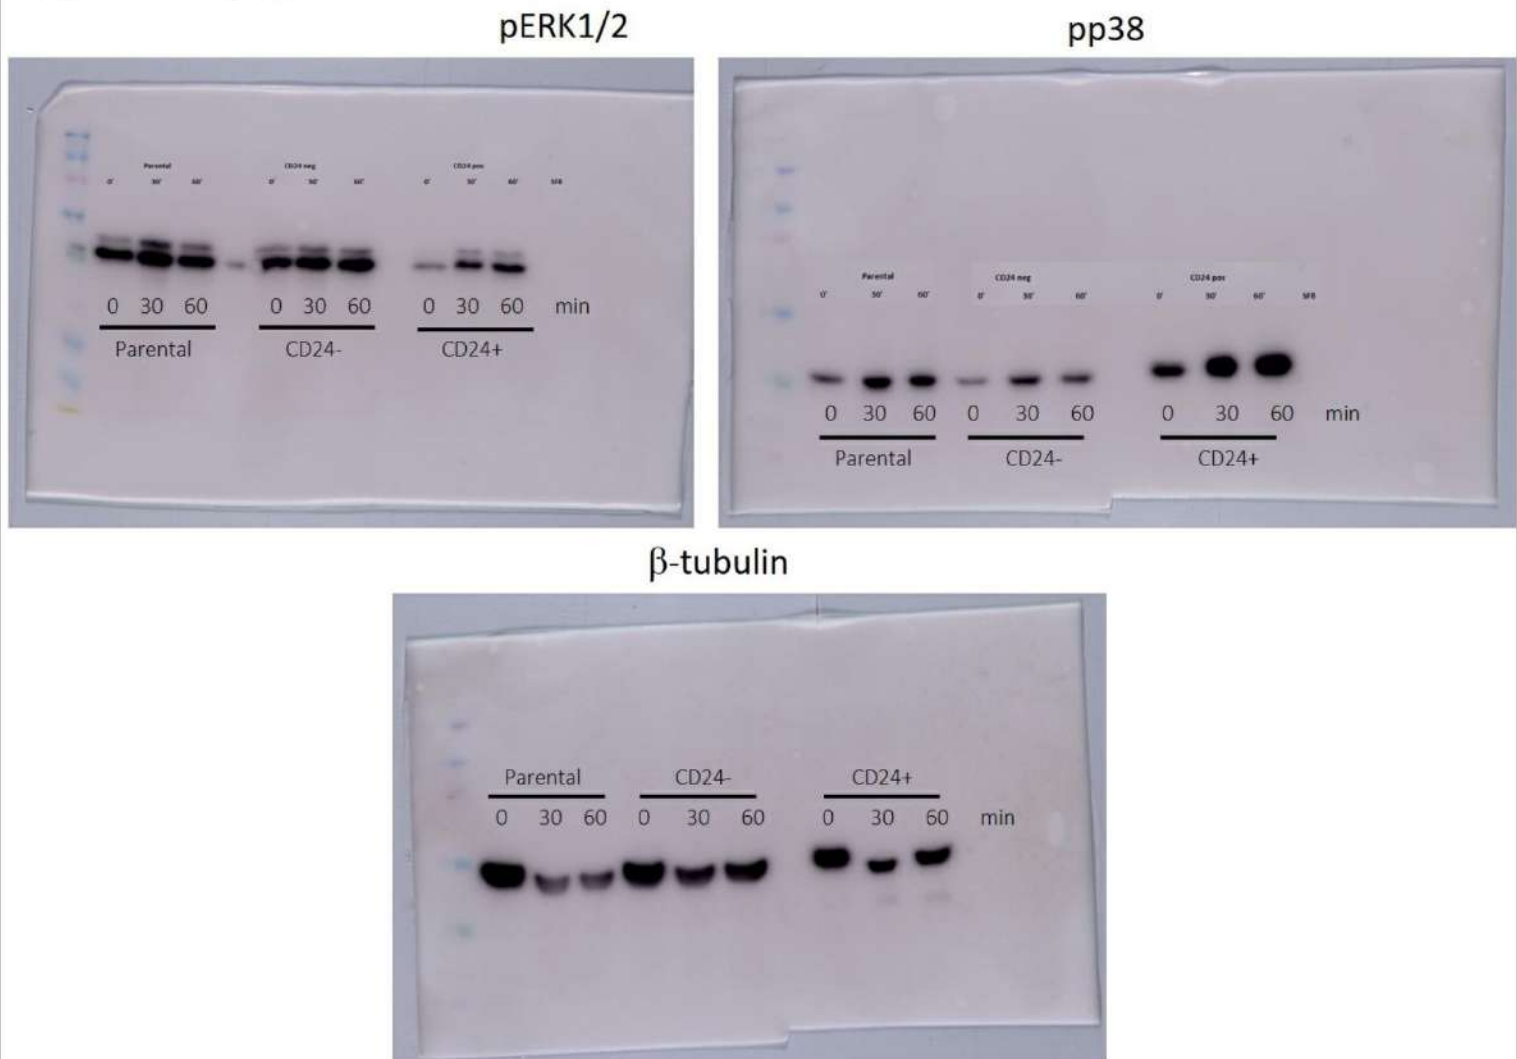

Supplementary figure 6 – Full length blots corresponding to the figure 4a of the manuscript.

**Supplementary figure 7**

pp38

$\beta$ -tubulin

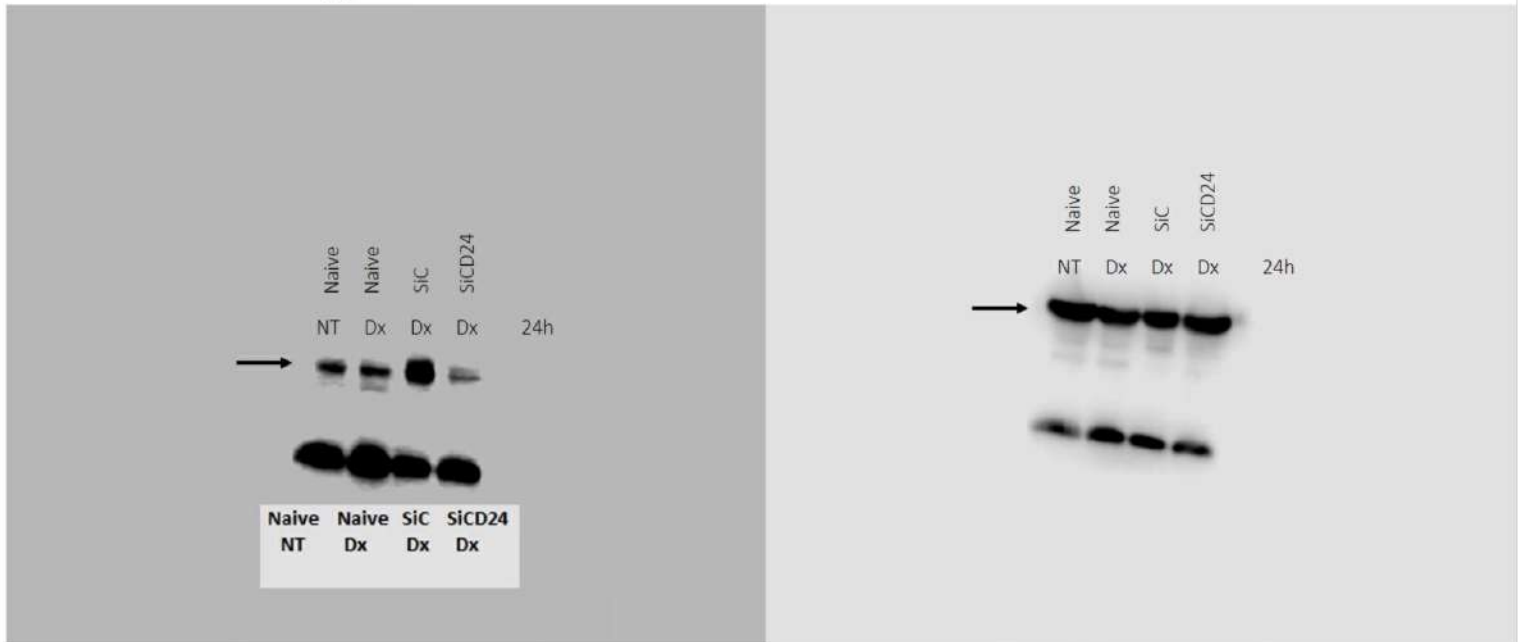

Supplementary figure 7 – Full length blots corresponding to the figure 4c of the manuscript.



**Supplementary figure 8**

Bax

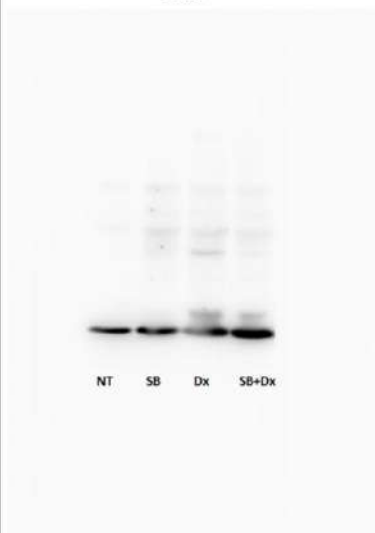

Bcl-2

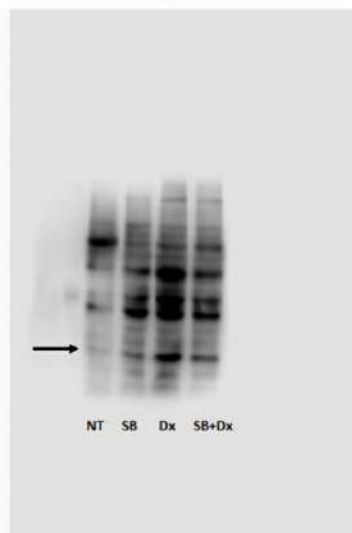

p53

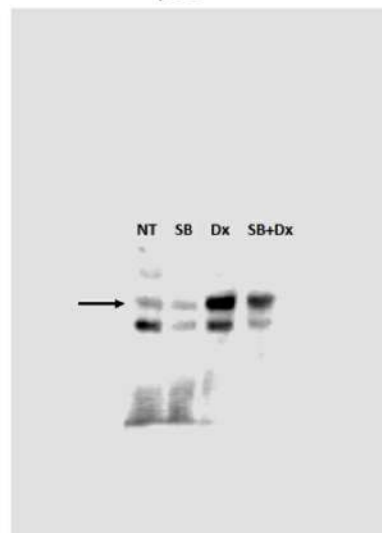

$\beta$ -tubulin

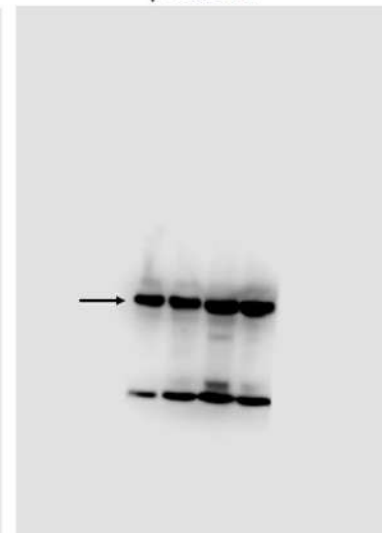

Supplementary figure 8 – Full length blots corresponding to the figure 4g of the manuscript.

## Supplementary figure 9

pERK1/2

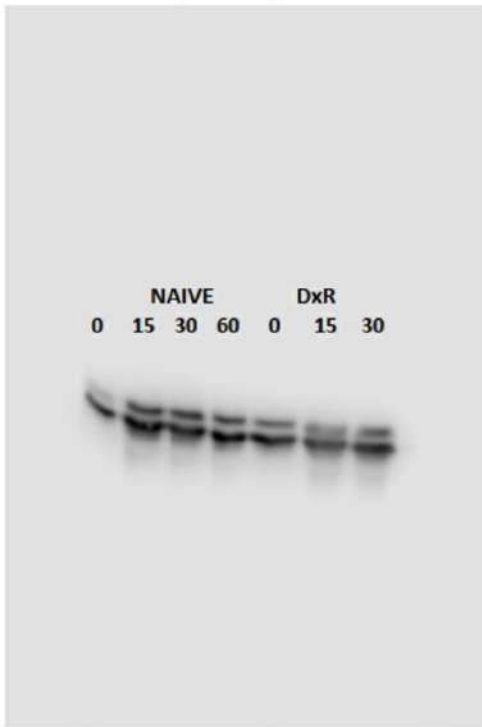

pp38

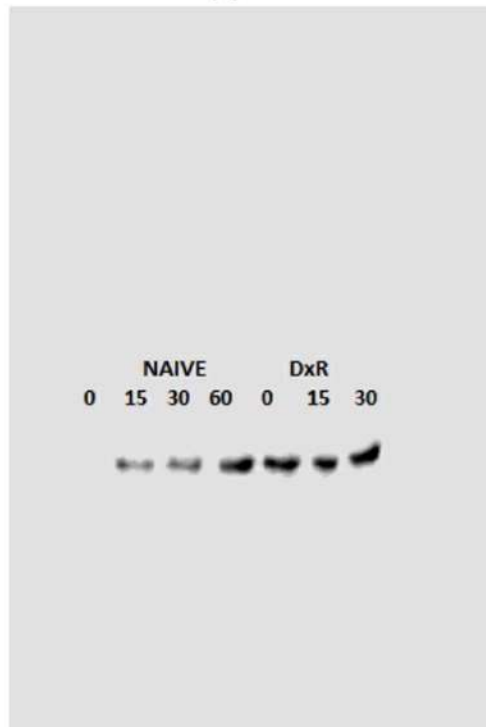

$\beta$ -tubulin

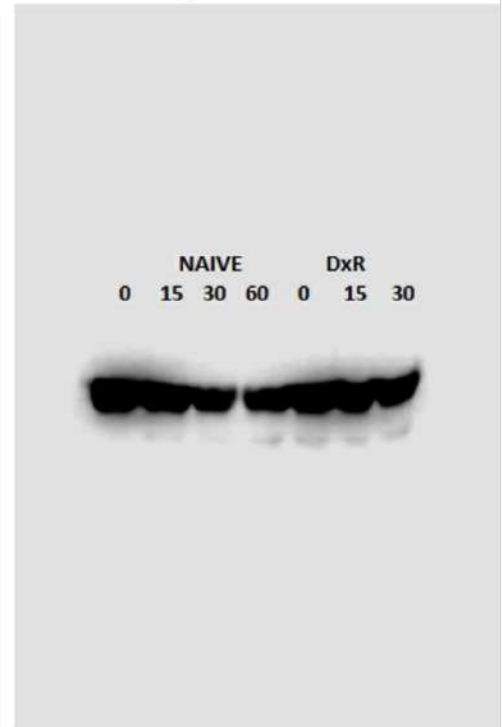

Supplementary figure 9 – Full length blots corresponding to the figure 5e of the manuscript.

**Supplementary figure 9.2 (variable exposure)**

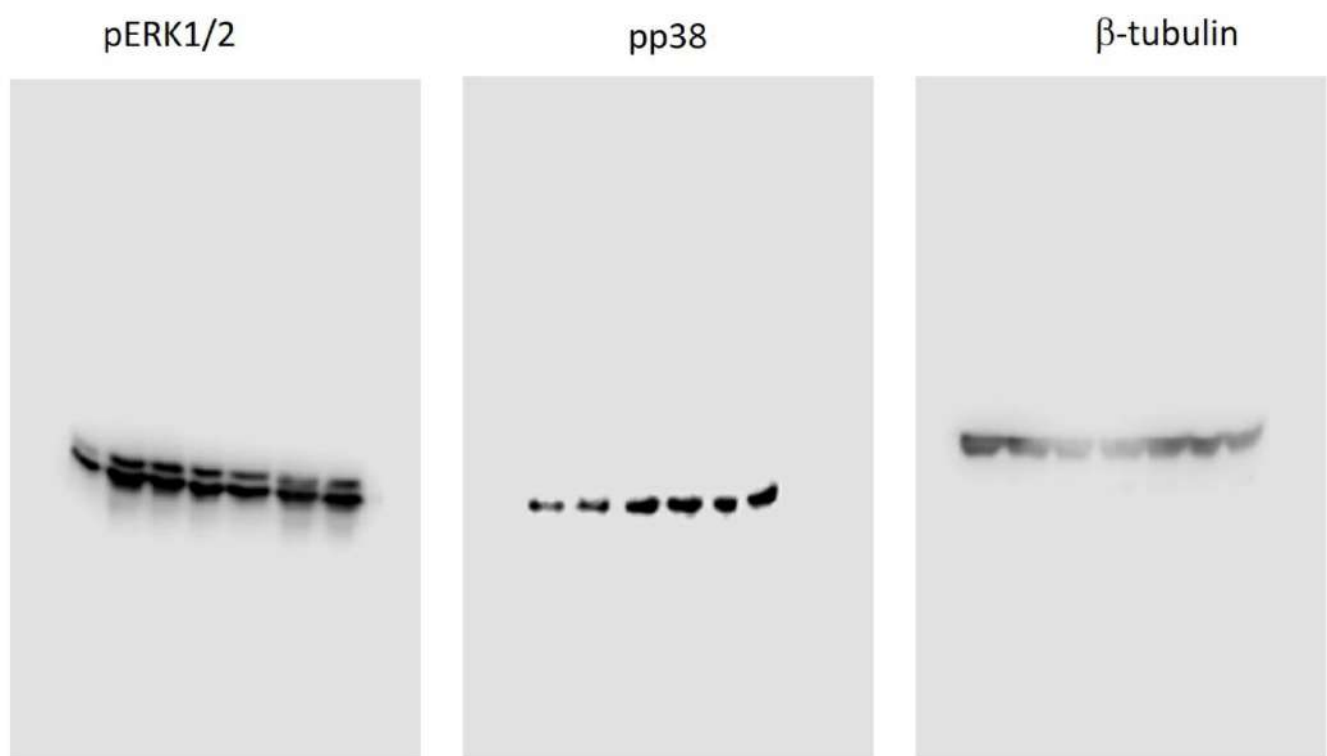

Supplementary figure 9.2 – Full length blots corresponding to the figure 5e of the manuscript.
